# Supplementary material
Source: PubMed Central journal article supplement (PMC3837999)
Supplement: IAI.00975-13_zii999090428so1.pdf [file IAI.00975-13_zii999090428so1.pdf]

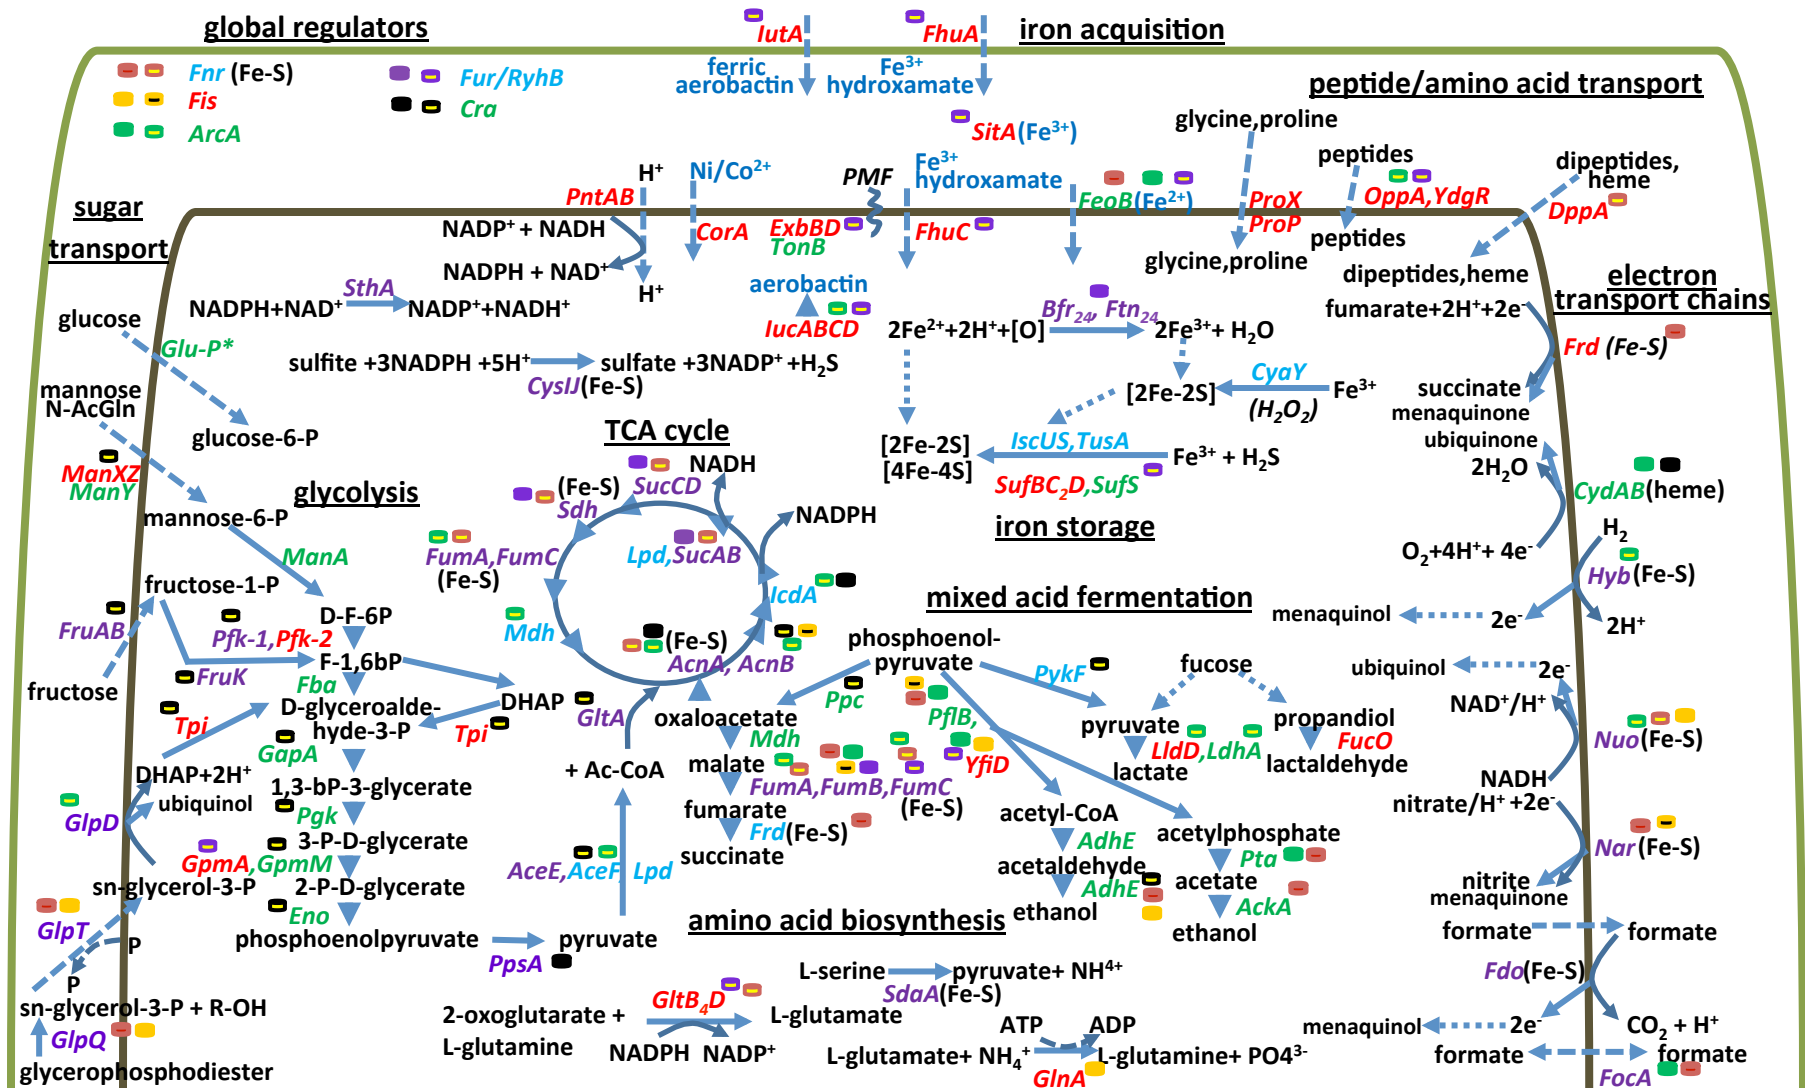

Figure S1. Iron starvation/energy metabolism and transcriptional control during intracellular growth
